# Supplementary material for: Heterogeneous Genetic Diversity Estimation of a Promising Domestication Medicinal Motherwort Leonurus Cardiaca Based on Chloroplast Genome Resources
Source: Front Genet. 2021 Sep 15;12:721022. doi: 10.3389/fgene.2021.721022 (PMC8479170; doi:10.3389/fgene.2021.721022)
Supplement: Supplementary file 4 [file table1.xlsx]

## Sheet: Sheet1
Table S1. Detail information of 22 L.cardiaca species
ID	Organism	Haplotype no.	Location	LSC	LSC-%GC	IR	IR-%GC	SSC	SSC-%GC	Total length (bp)	%GC	Raw data no.	Mapping reads no.	Percentage of chloroplast genome reads (%)	Chloroplast genome coverage (X)	GB accession no.
USCA-1	Leonurus cardiaca	Hap2	Santa Cruz, CA	82888	0.366	25646	0.434	17651	0.322	151831	0.384	21007868	804281	3.82848	795	MZ274168
USCA-2	Leonurus cardiaca	Hap1	Soquel, CA	82294	0.366	25644	0.434	17654	0.322	151236	0.384	16988970	1122660	6.60817	1113.48	MZ274150
USCA-3	Leonurus cardiaca	Hap6	Soquel, CA	82868	0.366	25644	0.434	17652	0.322	151808	0.384	22104996	2258992	10.2194	2232.09	MZ274158
USCA-4	Leonurus cardiaca	Hap1	Soquel, CA	82294	0.366	25644	0.434	17654	0.322	151236	0.384	20011994	2772892	13.8562	2750.23	MZ274160
USCO	Leonurus cardiaca	Hap5	Colorado, USA	82850	0.366	25644	0.434	17654	0.322	151792	0.384	19860676	925178	4.65834	914.256	MZ274156
USIL-1	Leonurus cardiaca	Hap2	JoDavies, IL	82888	0.366	25646	0.434	17651	0.322	151831	0.384	20607426	1019424	4.94688	1007.13	MZ274151
USIL-2	Leonurus cardiaca	Hap2	JoDavies, IL	82888	0.366	25646	0.434	17651	0.322	151831	0.384	27594150	3151951	11.4225	3113.94	MZ274152
USOR-1	Leonurus cardiaca	Hap1	Applegate Valley, OR	82294	0.366	25644	0.434	17654	0.322	151236	0.384	23740062	971254	4.0912	963.316	MZ274169
USOR-2	Leonurus cardiaca	Hap1	Applegate Valley, OR	82294	0.366	25644	0.434	17654	0.322	151236	0.384	20682784	953587	4.61054	945.794	MZ274149
USOR-3	Leonurus cardiaca	Hap1	Grants Pass, OR	82294	0.366	25644	0.434	17654	0.322	151236	0.384	24142628	2280340	9.44528	2261.7	MZ274164
USOR-4	Leonurus cardiaca	Hap1	Grants Pass, OR	82294	0.366	25644	0.434	17654	0.322	151236	0.384	22451906	1050291	4.67796	1041.71	MZ274165
USOR-5	Leonurus cardiaca	Hap1	Grants Pass, OR	82294	0.366	25644	0.434	17654	0.322	151236	0.384	27461908	3688804	13.4324	3658.66	MZ274166
USOR-6	Leonurus cardiaca	Hap1	Grants Pass, OR	82294	0.366	25644	0.434	17654	0.322	151236	0.384	26726236	2615768	9.78727	2594.39	MZ274167
USOR-7	Leonurus cardiaca	Hap2	Grants Pass, OR	82888	0.366	25646	0.434	17651	0.322	151831	0.384	16330634	771130	4.72198	761.831	MZ274163
USOR-8	Leonurus cardiaca	Hap1	Williams, OR	82294	0.366	25644	0.434	17654	0.322	151236	0.384	21519790	812640	3.77625	805.999	MZ274154
USOR-9	Leonurus cardiaca	Hap1	Williams, OR	82294	0.366	25644	0.434	17654	0.322	151236	0.384	20719732	680836	3.28593	675.272	MZ274157
USOR-10	Leonurus cardiaca	Hap1	Williams, OR	82294	0.366	25644	0.434	17654	0.322	151236	0.384	22680650	1085851	4.78757	1076.98	MZ274159
EUPO-1	Leonurus cardiaca	Hap3	Poland	82819	0.366	25644	0.434	17654	0.322	151761	0.384	28712920	1314778	4.57905	1299.52	MZ274153
EUPO-2	Leonurus cardiaca	Hap4	Poland	82872	0.366	25644	0.434	17655	0.322	151815	0.384	26066988	572567	2.19652	565.722	MZ274155
EUPO-3	Leonurus cardiaca	Hap5	Poland	82850	0.366	25644	0.434	17654	0.322	151792	0.384	26621110	708773	2.66245	700.405	MZ274161
EUPO-4	Leonurus cardiaca	Hap7	Poland	82848	0.366	25644	0.434	17654	0.322	151790	0.384	23930924	943562	3.94286	932.435	MZ274162
CNTI	Leonurus cardiaca	Hap8	Qitai. Tibet, China	82869	0.366	25653	0.434	17653	0.322	151828	0.384	31010620	1934602	6.23851	1911.31	MZ274170
